# Supplementary material
Source: PubMed Central journal article supplement (PMC6563327)

An Evaluation of the Impact of Co-occurring Anxiety  
and Substance Use Disorder on Bipolar Disorder  
Illness Outcomes in STEP-BD (JAD-2018-1672)

Reviewer Supplement

## **Use of Current (as Opposed to Lifetime) Co-occurring Diagnoses: Associations between “Substance Use Problems,” “Pathological Anxiety,” and Select, Evaluated Clinical Variables**

(only models [ $n=4$ ] in which lifetime Substance Use Problems originally failed to significantly predict a given clinical variable when jointly modeled with Pathological Anxiety were evaluated)

**Conclusion:** Although 2 of the 4 evaluated models demonstrated different results (i.e., Substance Use Problems significantly predicting the outcome in question), the new-found associations involving Substance Use Problems were small (unlikely to be “clinically” significant) and associated with correspondingly large p-values (i.e.,  $p=0.023-0.024$ ) that would not survive correction for multiple comparisons.

## STANDARDIZED MODEL RESULTS

INT = Pathological Anxiety  
EXT = Substance Use Problems

## %anxious

STDYX Standardization

|             | Estimate | S.E.  | Est./S.E. | Two-Tailed<br>P-Value |
|-------------|----------|-------|-----------|-----------------------|
| INT BY      |          |       |           |                       |
| PHOBIAC     | 0.606    | 0.045 | 13.492    | 0.000                 |
| OCDC        | 0.529    | 0.036 | 14.841    | 0.000                 |
| PTSDC       | 0.569    | 0.044 | 12.850    | 0.000                 |
| GENANXC     | 0.527    | 0.034 | 15.712    | 0.000                 |
| AGC         | 0.910    | 0.024 | 38.269    | 0.000                 |
| PDC         | 0.879    | 0.023 | 38.854    | 0.000                 |
| EXT BY      |          |       |           |                       |
| ALCDEPC     | 0.883    | 0.042 | 20.810    | 0.000                 |
| ALCABUSC    | 0.919    | 0.038 | 24.053    | 0.000                 |
| DRUGDEPC    | 0.779    | 0.039 | 20.146    | 0.000                 |
| DRUGABC     | 0.795    | 0.030 | 26.854    | 0.000                 |
| ANXDAY ON   |          |       |           |                       |
| INT         | 0.466    | 0.014 | 33.987    | 0.000                 |
| EXT         | 0.060    | 0.026 | 2.262     | 0.024                 |
| EXT WITH    |          |       |           |                       |
| INT         | 0.240    | 0.038 | 6.398     | 0.000                 |
| Intercepts  |          |       |           |                       |
| ANXDAY      | 1.040    | 0.031 | 33.921    | 0.000                 |
| Thresholds  |          |       |           |                       |
| PHOBIAC\$1  | 1.006    | 0.093 | 10.794    | 0.000                 |
| OCDC\$1     | 1.399    | 0.069 | 20.252    | 0.000                 |
| PTSDC\$1    | 1.360    | 0.084 | 16.198    | 0.000                 |
| ALCDEPC\$1  | 1.402    | 0.069 | 20.309    | 0.000                 |
| ALCABUSC\$1 | 1.322    | 0.054 | 24.594    | 0.000                 |
| DRUGDEPC\$1 | 1.575    | 0.062 | 25.511    | 0.000                 |
| DRUGABC\$1  | 1.481    | 0.064 | 22.967    | 0.000                 |
| GENANXC\$1  | 0.923    | 0.080 | 11.578    | 0.000                 |
| AGC\$1      | 1.167    | 0.099 | 11.844    | 0.000                 |
| PDC\$1      | 1.203    | 0.083 | 14.418    | 0.000                 |

## %depressed

STDYX Standardization

|             | Estimate | S.E.  | Est./S.E. | Two-Tailed<br>P-Value |
|-------------|----------|-------|-----------|-----------------------|
| INT BY      |          |       |           |                       |
| PHOBIAC     | 0.613    | 0.046 | 13.268    | 0.000                 |
| OCDC        | 0.521    | 0.038 | 13.881    | 0.000                 |
| PTSDC       | 0.573    | 0.042 | 13.785    | 0.000                 |
| GENANXC     | 0.476    | 0.033 | 14.414    | 0.000                 |
| AGC         | 0.930    | 0.020 | 47.004    | 0.000                 |
| PDC         | 0.887    | 0.019 | 45.820    | 0.000                 |
| EXT BY      |          |       |           |                       |
| ALCDEPC     | 0.883    | 0.043 | 20.711    | 0.000                 |
| ALCABUSC    | 0.921    | 0.038 | 24.244    | 0.000                 |
| DRUGDEPC    | 0.778    | 0.039 | 20.009    | 0.000                 |
| DRUGABC     | 0.794    | 0.029 | 27.227    | 0.000                 |
| DEPDAY ON   |          |       |           |                       |
| INT         | 0.348    | 0.022 | 16.069    | 0.000                 |
| EXT         | 0.063    | 0.028 | 2.268     | 0.023                 |
| EXT WITH    |          |       |           |                       |
| INT         | 0.238    | 0.037 | 6.366     | 0.000                 |
| Intercepts  |          |       |           |                       |
| DEPDAY      | 1.444    | 0.053 | 27.270    | 0.000                 |
| Thresholds  |          |       |           |                       |
| PHOBIAC\$1  | 1.005    | 0.093 | 10.783    | 0.000                 |
| OCDC\$1     | 1.396    | 0.069 | 20.204    | 0.000                 |
| PTSDC\$1    | 1.358    | 0.083 | 16.267    | 0.000                 |
| ALCDEPC\$1  | 1.401    | 0.069 | 20.252    | 0.000                 |
| ALCABUSC\$1 | 1.321    | 0.054 | 24.550    | 0.000                 |
| DRUGDEPC\$1 | 1.574    | 0.061 | 25.603    | 0.000                 |
| DRUGABC\$1  | 1.480    | 0.064 | 23.031    | 0.000                 |
| GENANXC\$1  | 0.916    | 0.079 | 11.570    | 0.000                 |
| AGC\$1      | 1.161    | 0.097 | 11.923    | 0.000                 |
| PDC\$1      | 1.195    | 0.083 | 14.475    | 0.000                 |

STANDARDIZED MODEL RESULTS

INT = Pathological Anxiety  
EXT = Substance Use Problems

**LIFE-Rift**

**Rapid Cycling**

STDYX Standardization

STDYX Standardization

|          | Estimate | S.E.  | Est./S.E. | Two-Tailed P-Value |
|----------|----------|-------|-----------|--------------------|
| INT BY   |          |       |           |                    |
| PHOBIAC  | 0.613    | 0.045 | 13.730    | 0.000              |
| OCDC     | 0.522    | 0.038 | 13.723    | 0.000              |
| PTSDC    | 0.577    | 0.039 | 14.675    | 0.000              |
| GENANXC  | 0.467    | 0.033 | 14.203    | 0.000              |
| AGC      | 0.935    | 0.020 | 47.886    | 0.000              |
| PDC      | 0.881    | 0.021 | 41.630    | 0.000              |
| EXT BY   |          |       |           |                    |
| ALCDEPC  | 0.883    | 0.043 | 20.328    | 0.000              |
| ALCABUSC | 0.920    | 0.039 | 23.563    | 0.000              |
| DRUGDEPC | 0.780    | 0.039 | 19.794    | 0.000              |
| DRUGABC  | 0.798    | 0.030 | 26.890    | 0.000              |

|          |       |       |        |       |
|----------|-------|-------|--------|-------|
| LRTOT ON |       |       |        |       |
| INT      | 0.366 | 0.023 | 15.651 | 0.000 |
| EXT      | 0.027 | 0.023 | 1.173  | 0.241 |

|          |       |       |       |       |
|----------|-------|-------|-------|-------|
| EXT WITH |       |       |       |       |
| INT      | 0.240 | 0.040 | 5.936 | 0.000 |

|            |       |       |        |       |
|------------|-------|-------|--------|-------|
| Intercepts |       |       |        |       |
| LRTOT      | 3.046 | 0.129 | 23.598 | 0.000 |

|             |       |       |        |       |
|-------------|-------|-------|--------|-------|
| Thresholds  |       |       |        |       |
| PHOBIAC\$1  | 1.004 | 0.094 | 10.684 | 0.000 |
| OCDC\$1     | 1.396 | 0.069 | 20.125 | 0.000 |
| PTSDC\$1    | 1.358 | 0.084 | 16.236 | 0.000 |
| ALCDEPC\$1  | 1.401 | 0.069 | 20.224 | 0.000 |
| ALCABUSC\$1 | 1.321 | 0.054 | 24.498 | 0.000 |
| DRUGDEPC\$1 | 1.574 | 0.062 | 25.581 | 0.000 |
| DRUGABC\$1  | 1.480 | 0.064 | 22.998 | 0.000 |
| GENANXC\$1  | 0.915 | 0.080 | 11.404 | 0.000 |
| AGC\$1      | 1.160 | 0.099 | 11.755 | 0.000 |
| PDC\$1      | 1.194 | 0.084 | 14.250 | 0.000 |

|          | Estimate | S.E.  | Est./S.E. | Two-Tailed P-Value |
|----------|----------|-------|-----------|--------------------|
| INT BY   |          |       |           |                    |
| PHOBIAC  | 0.606    | 0.050 | 12.192    | 0.000              |
| OCDC     | 0.521    | 0.036 | 14.434    | 0.000              |
| PTSDC    | 0.561    | 0.043 | 13.148    | 0.000              |
| GENANXC  | 0.462    | 0.037 | 12.439    | 0.000              |
| AGC      | 0.929    | 0.019 | 50.098    | 0.000              |
| PDC      | 0.888    | 0.021 | 41.993    | 0.000              |
| EXT BY   |          |       |           |                    |
| ALCDEPC  | 0.883    | 0.043 | 20.667    | 0.000              |
| ALCABUSC | 0.919    | 0.039 | 23.318    | 0.000              |
| DRUGDEPC | 0.781    | 0.039 | 19.868    | 0.000              |
| DRUGABC  | 0.798    | 0.030 | 26.668    | 0.000              |

|           |       |       |       |       |
|-----------|-------|-------|-------|-------|
| RAPIDC ON |       |       |       |       |
| INT       | 0.311 | 0.060 | 5.226 | 0.000 |
| EXT       | 0.036 | 0.039 | 0.935 | 0.350 |

|          |       |       |       |       |
|----------|-------|-------|-------|-------|
| EXT WITH |       |       |       |       |
| INT      | 0.240 | 0.040 | 5.999 | 0.000 |

|             |       |       |        |       |
|-------------|-------|-------|--------|-------|
| Thresholds  |       |       |        |       |
| PHOBIAC\$1  | 1.003 | 0.094 | 10.689 | 0.000 |
| OCDC\$1     | 1.396 | 0.069 | 20.107 | 0.000 |
| PTSDC\$1    | 1.356 | 0.084 | 16.112 | 0.000 |
| ALCDEPC\$1  | 1.400 | 0.069 | 20.220 | 0.000 |
| ALCABUSC\$1 | 1.321 | 0.054 | 24.467 | 0.000 |
| DRUGDEPC\$1 | 1.574 | 0.062 | 25.550 | 0.000 |
| DRUGABC\$1  | 1.480 | 0.064 | 22.957 | 0.000 |
| GENANXC\$1  | 0.914 | 0.080 | 11.452 | 0.000 |
| RAPIDC\$1   | 0.141 | 0.096 | 1.476  | 0.140 |
| AGC\$1      | 1.158 | 0.100 | 11.599 | 0.000 |
| PDC\$1      | 1.193 | 0.085 | 14.109 | 0.000 |

## **Moderation Analyses: Associations between “Substance Use Problems,” “Pathological Anxiety,” and Evaluated Clinical Variables BY Bipolar Disorder Subtype (I vs. II)**

(All models were tested, however only models with statistically significant interactions were included in this report)

**Conclusion:** Three of the 10 evaluated models demonstrated significant interactions between Bipolar Disorder subtype and self-reported %depressed, %elevated, and %anxious days in the year preceding assessment. Once again, these three moderation effects were small in magnitude and associated with relatively large p-values that would be unlikely to survive control for multiple comparisons. Interpretation of these interactions is also not entirely clear. For example, individuals with Bipolar II Disorder had relatively more depressed days, however, individuals with Bipolar I Disorder had a somewhat stronger association between Pathological Anxiety and %depressed days. Furthermore, given that we did not have a priori hypotheses concerning how associations between Pathological Anxiety, Substance Use Problems, and clinical variables would be moderated by Bipolar subtype, we do not feel comfortable attempting to interpret these findings.

### Tests of Between-Subjects Effects

Dependent Variable: DEPRESSED\_DAYS\_YR

| BPMIC                | 32629.949       | 1        | 32629.949       | 39.456       | .000        |
|----------------------|-----------------|----------|-----------------|--------------|-------------|
| INT_L                | 95664.432       | 1        | 95664.432       | 115.676      | .000        |
| EXT_L                | 238.678         | 1        | 238.678         | .289         | .591        |
| <b>BPMIC * INT_L</b> | <b>3730.734</b> | <b>1</b> | <b>3730.734</b> | <b>4.511</b> | <b>.034</b> |
| BPMIC * EXT_L        | 1590.903        | 1        | 1590.903        | 1.924        | .166        |

Dependent Variable: DEPRESSED\_DAYS\_YR

| BPMIC | Mean                | Std. Error | 95% Confidence Interval |             |
|-------|---------------------|------------|-------------------------|-------------|
|       |                     |            | Lower Bound             | Upper Bound |
| .00   | 41.313 <sup>a</sup> | .637       | 40.063                  | 42.562      |
| 1.00  | 48.235 <sup>a</sup> | .943       | 46.386                  | 50.084      |

a. Covariates appearing in the model are evaluated at the following values: INT\_L = -.00270, EXT\_L = -.00294.

BPI

BPII

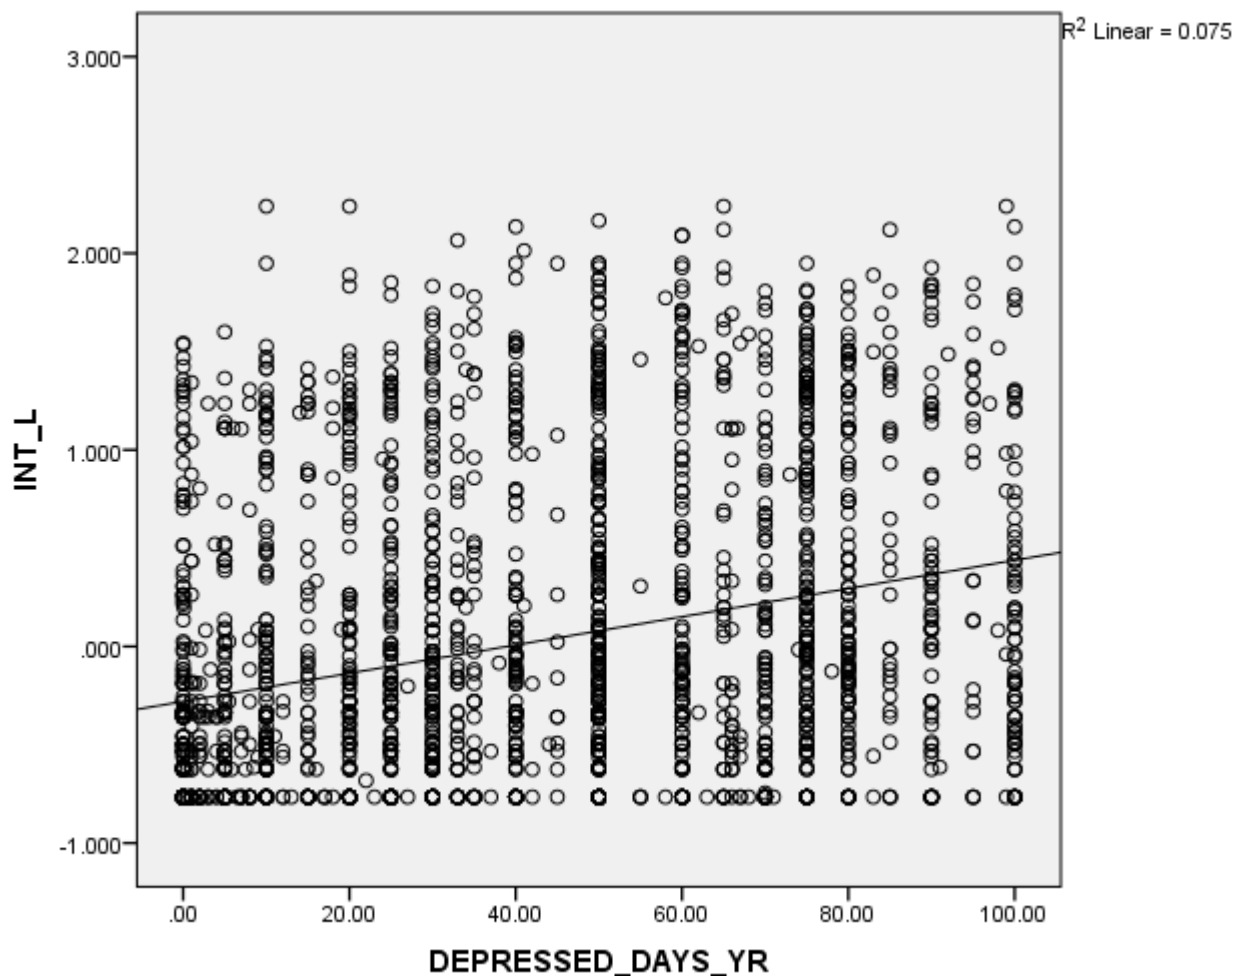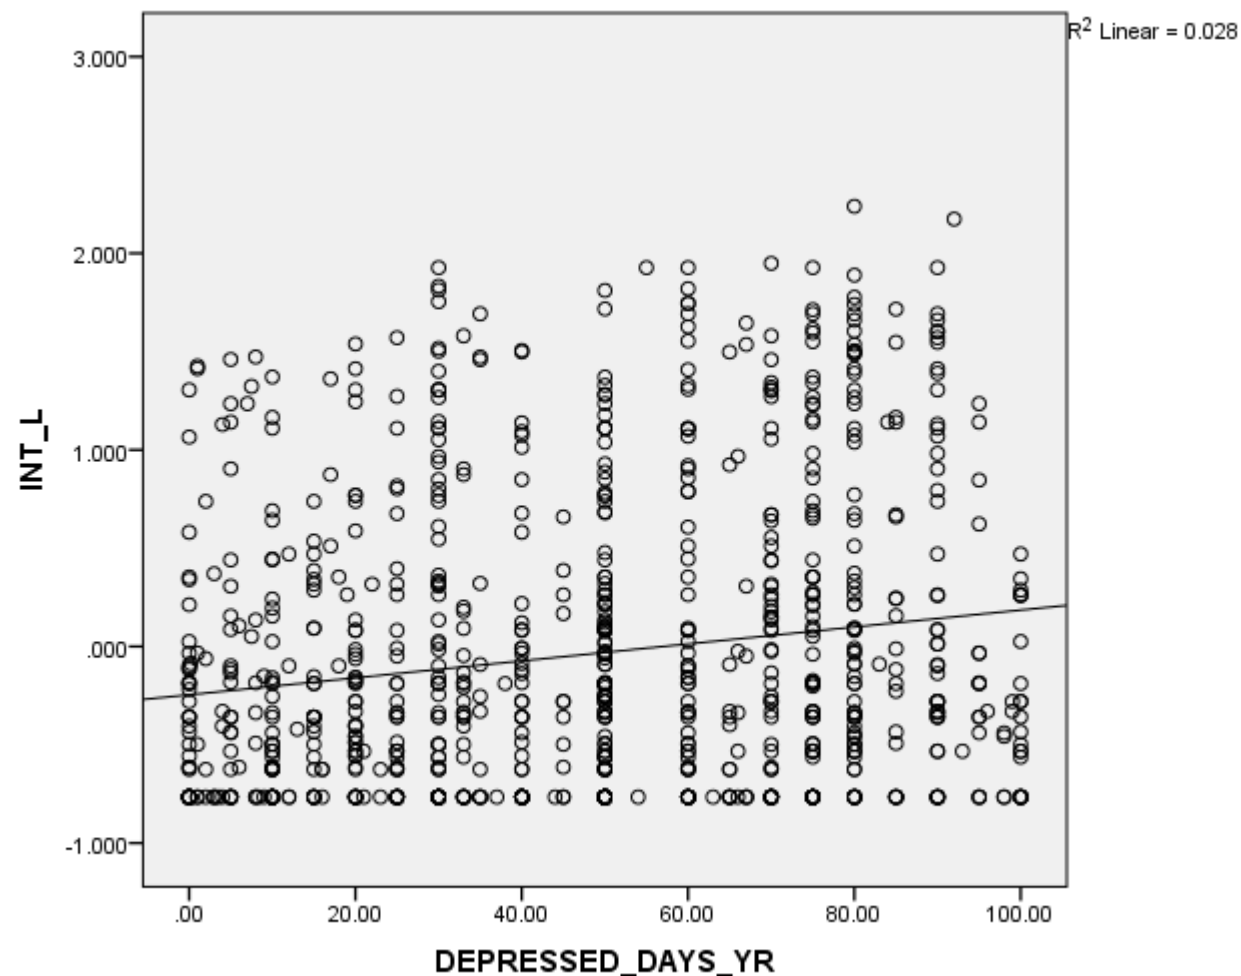

### Tests of Between-Subjects Effects

Dependent Variable: ELEVATED\_DAYS\_YR

| Source        | Type III Sum of Squares | df | Mean Square | F      | Sig. |
|---------------|-------------------------|----|-------------|--------|------|
| BPMIC         | 5268.095                | 1  | 5268.095    | 12.198 | .000 |
| INT_L         | 2677.468                | 1  | 2677.468    | 6.200  | .013 |
| EXT_L         | 3444.616                | 1  | 3444.616    | 7.976  | .005 |
| BPMIC * INT_L | 1662.244                | 1  | 1662.244    | 3.849  | .050 |
| BPMIC * EXT_L | 2659.058                | 1  | 2659.058    | 6.157  | .013 |

Dependent Variable: ELEVATED\_DAYS\_YR

| BPMIC | Mean                | Std. Error | 95% Confidence Interval |             |
|-------|---------------------|------------|-------------------------|-------------|
|       |                     |            | Lower Bound             | Upper Bound |
| .00   | 20.227 <sup>a</sup> | .461       | 19.323                  | 21.132      |
| 1.00  | 17.453 <sup>a</sup> | .685       | 16.110                  | 18.795      |

a. Covariates appearing in the model are evaluated at the following values: INT\_L = -.00304, EXT\_L = -.00134.

BPI

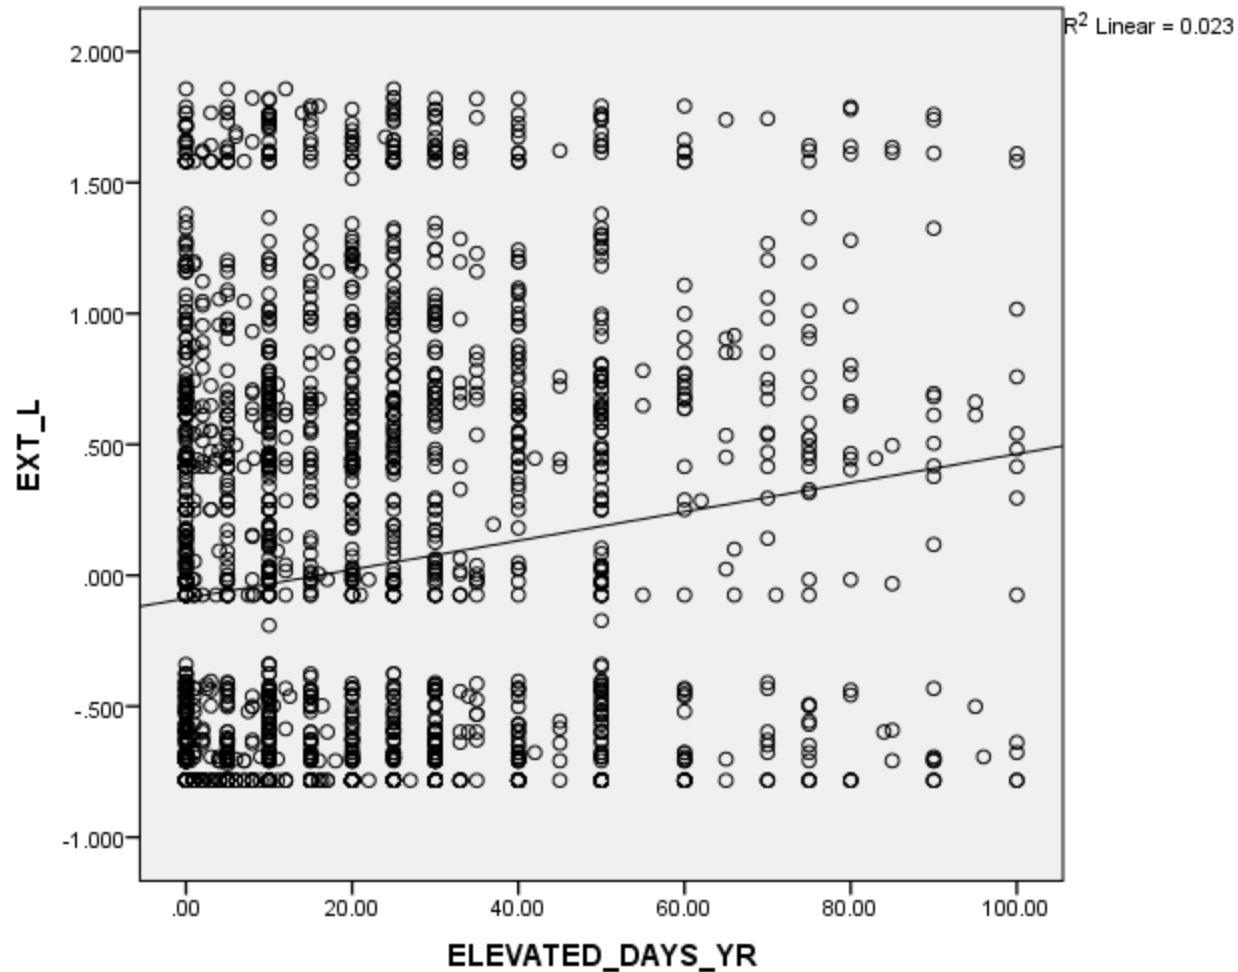

BPII

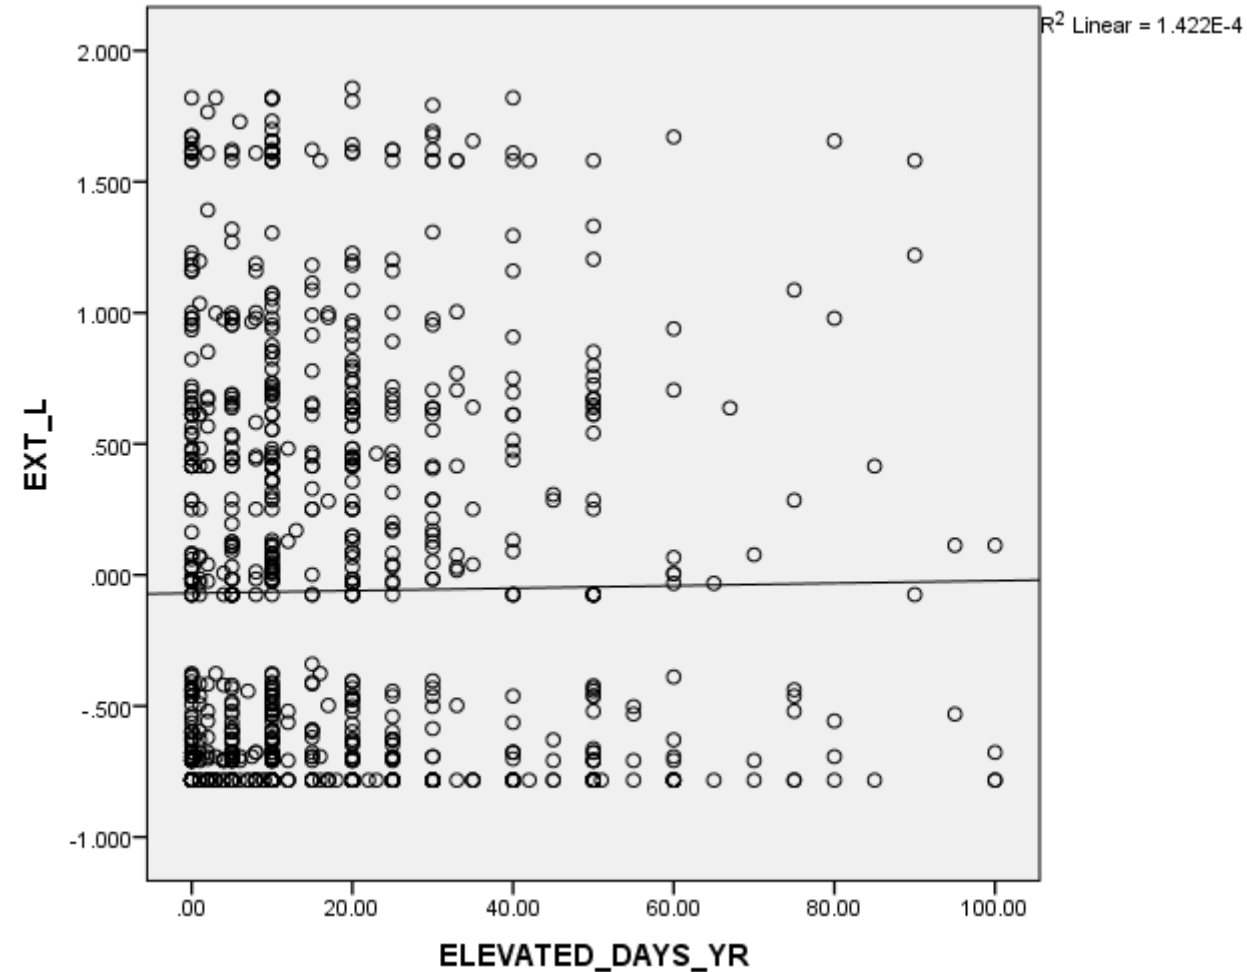



### Tests of Between-Subjects Effects

Dependent Variable: ANXIETY\_DAYS\_YR

| Source         | Type III Sum of Squares | df | Mean Square | F       | Sig. |
|----------------|-------------------------|----|-------------|---------|------|
| BPIVIC         | 5617.856                | 1  | 5617.856    | 5.601   | .018 |
| INT_L          | 278960.017              | 1  | 278960.017  | 278.100 | .000 |
| EXT_L          | 2189.044                | 1  | 2189.044    | 2.182   | .140 |
| BPIVIC * INT_L | 354.582                 | 1  | 354.582     | .353    | .552 |
| BPIVIC * EXT_L | 4467.310                | 1  | 4467.310    | 4.454   | .035 |

Dependent Variable: ANXIETY\_DAYS\_YR

| BPIVIC | Mean                | Std. Error | 95% Confidence Interval |             |
|--------|---------------------|------------|-------------------------|-------------|
|        |                     |            | Lower Bound             | Upper Bound |
| .00    | 33.993 <sup>a</sup> | .707       | 32.607                  | 35.379      |
| 1.00   | 36.880 <sup>a</sup> | 1.043      | 34.835                  | 38.925      |

a. Covariates appearing in the model are evaluated at the following values: INT\_L = -.00127, EXT\_L = -.00097.

BPI

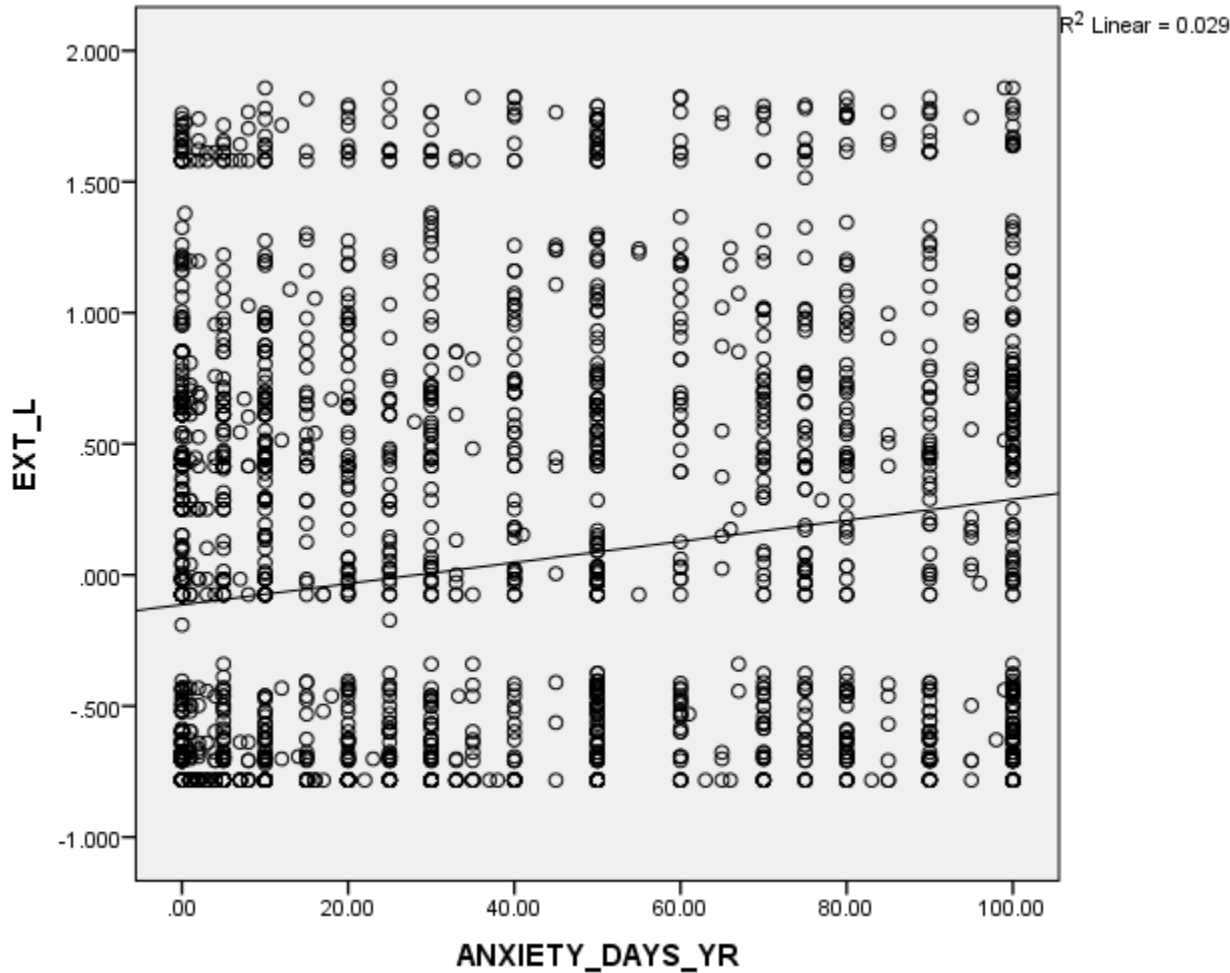

BPII

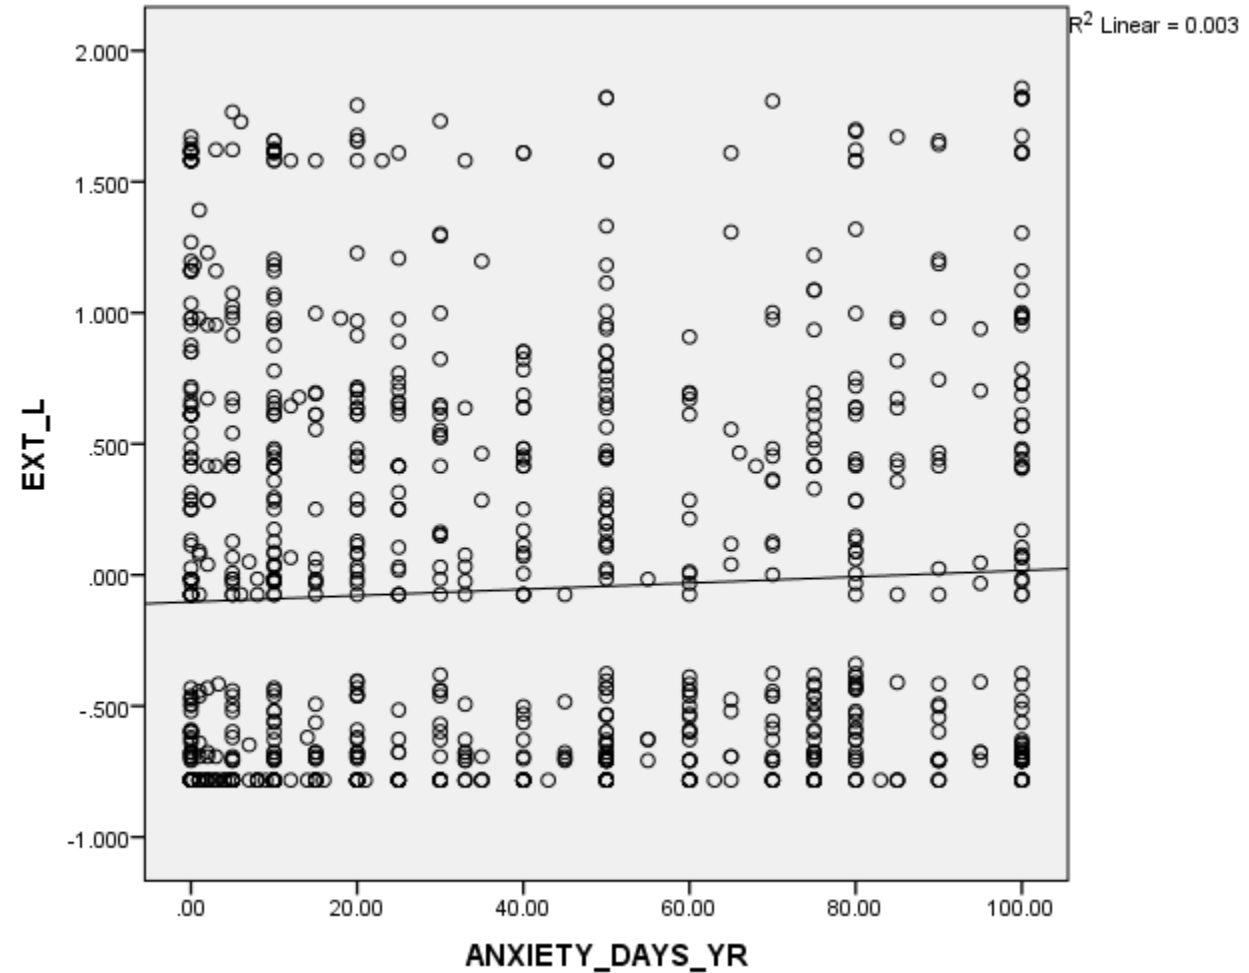

Supplement: NIHMS1518162-supplement-1.pdf [file NIHMS1518162-supplement-1.pdf]
